# Supplementary material for: Regioselective opening of unsymmetrical cyclic anhydrides: synthesis of N-glycosylated isoasparagine and isoglutamine conjugates
Source: Royal Society of Chemistry journal article supplement (doi:10.1039/c4ra01234h), 2014-01-01
Supplement: c4ra01234h1.pdf [file c4ra01234h1.pdf]

## Supporting Information

# Regioselective Opening of Unsymmetrical Cyclic Anhydrides: Synthesis of *N*-Glycosylated Isoasparagine and Isoglutamine Conjugates

Laxminarayan Sahoo,\* Anadi Singhamahapatra, Vankatachalam Ramkumar  
and Duraikkannu Loganathan<sup>†</sup>

Department of Chemistry, Indian Institute of Technology Madras, Chennai – 600036, India  
Email: [laxminarayanchem@gmail.com](mailto:laxminarayanchem@gmail.com)

---

\* Correspondence: Laxminarayan Sahoo, Department of Chemistry, Indian Institute of Technology Madras, Chennai – 600036, India; Tel.: +91-44-22575221, +91-9380820326; Fax: +91-44-22570509; E-mail: [laxminarayanchem@gmail.com](mailto:laxminarayanchem@gmail.com)

<sup>†</sup> Deceased on 9<sup>th</sup> February, 2013

## Table of content

|                                                                                                        |     |
|--------------------------------------------------------------------------------------------------------|-----|
| <b>Figure S1</b> $^1\text{H}$ NMR (400 MHz, $\text{CDCl}_3$ ) spectrum of <b>3</b> .....               | S3  |
| <b>Figure S2</b> $^1\text{H}$ - $^1\text{H}$ COSY NMR spectrum of <b>3</b> .....                       | S3  |
| <b>Figure S3</b> $^{13}\text{C}$ NMR (100 MHz, $\text{CDCl}_3$ ) spectrum of <b>3</b> .....            | S4  |
| <b>Figure S4</b> HSQC spectrum (DMSO) of <b>3</b> .....                                                | S4  |
| <b>Figure S5</b> HMBC spectrum (DMSO) of <b>3</b> .....                                                | S5  |
| <b>Figure S6</b> $^1\text{H}$ NMR (400 MHz, $\text{MeOD} + \text{CDCl}_3$ ) spectrum of <b>7</b> ..... | S5  |
| <b>Figure S7</b> $^1\text{H}$ - $^1\text{H}$ COSY NMR spectrum of <b>7</b> .....                       | S6  |
| <b>Figure S8</b> $^{13}\text{C}$ NMR (100 MHz, DMSO) spectrum of <b>7</b> .....                        | S6  |
| <b>Figure S9</b> $^1\text{H}$ NMR (400 MHz, $\text{CDCl}_3$ ) spectrum of <b>10</b> .....              | S7  |
| <b>Figure S10</b> $^1\text{H}$ - $^1\text{H}$ COSY NMR spectrum of <b>10</b> .....                     | S7  |
| <b>Figure S11</b> $^{13}\text{C}$ NMR (100 MHz, $\text{CDCl}_3$ ) spectrum of <b>10</b> .....          | S8  |
| <b>Figure S12</b> HSQC spectrum (DMSO) of .....                                                        | S8  |
| <b>Figure S13</b> HMBC spectrum (DMSO) of .....                                                        | S9  |
| <b>Figure S14</b> $^1\text{H}$ NMR (400 MHz, $\text{D}_2\text{O}$ ) spectrum of <b>11</b> .....        | S9  |
| <b>Figure S15</b> $^1\text{H}$ - $^1\text{H}$ COSY NMR spectrum of <b>11</b> .....                     | S10 |
| <b>Figure S16</b> $^{13}\text{C}$ NMR (100 MHz, $\text{D}_2\text{O}$ ) spectrum of <b>11</b> .....     | S10 |
| <b>Figure S17</b> HSQC spectrum of <b>11</b> .....                                                     | S11 |
| <b>Figure S18</b> HMBC spectrum of <b>11</b> .....                                                     | S11 |
| <b>Figure S19</b> ORTEP diagram of the compound <b>3</b> .....                                         | S12 |
| <b>Figure S20</b> Unit cell packing diagram of compound <b>3</b> with H-bonding.....                   | S12 |
| <b>Table S1</b> Data collection and refinement parameters for the compound <b>3</b> .....              | S13 |

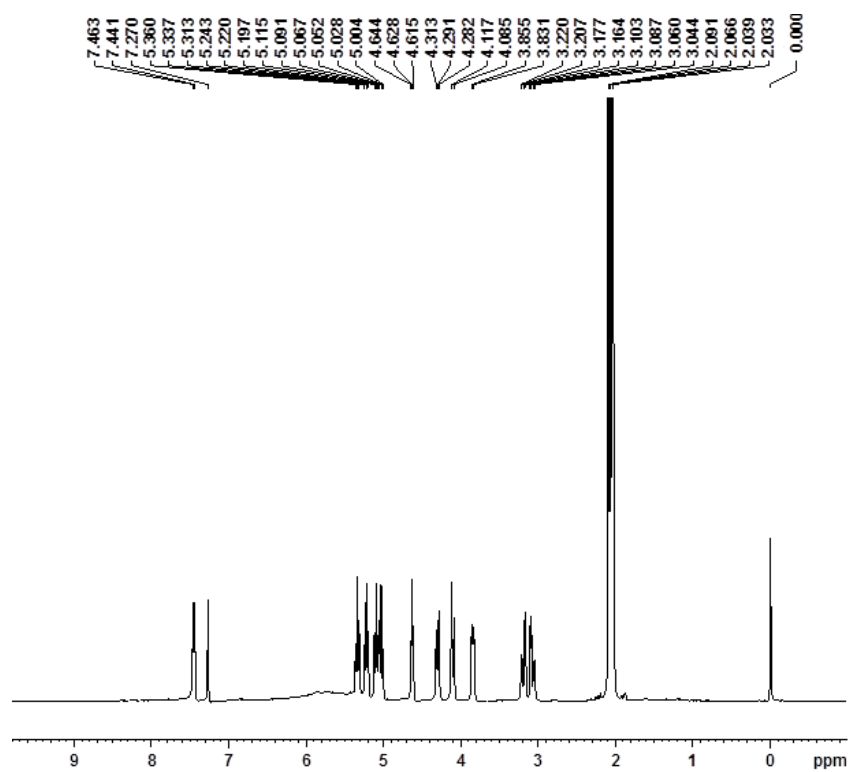

Figure S1  $^1\text{H}$  NMR (400 MHz,  $\text{CDCl}_3$ ) spectrum of **3**

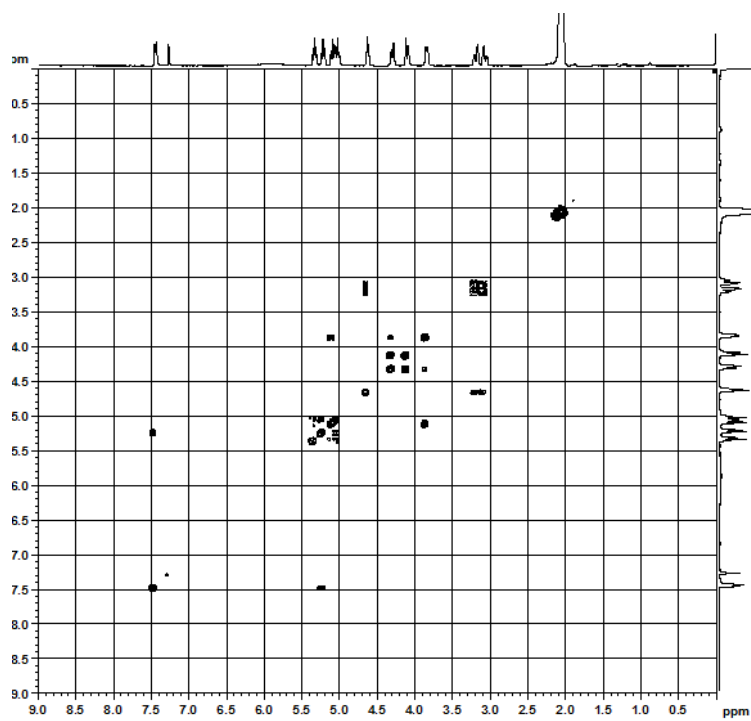

Figure S2  $^1\text{H}$ - $^1\text{H}$  COSY NMR spectrum of **3**

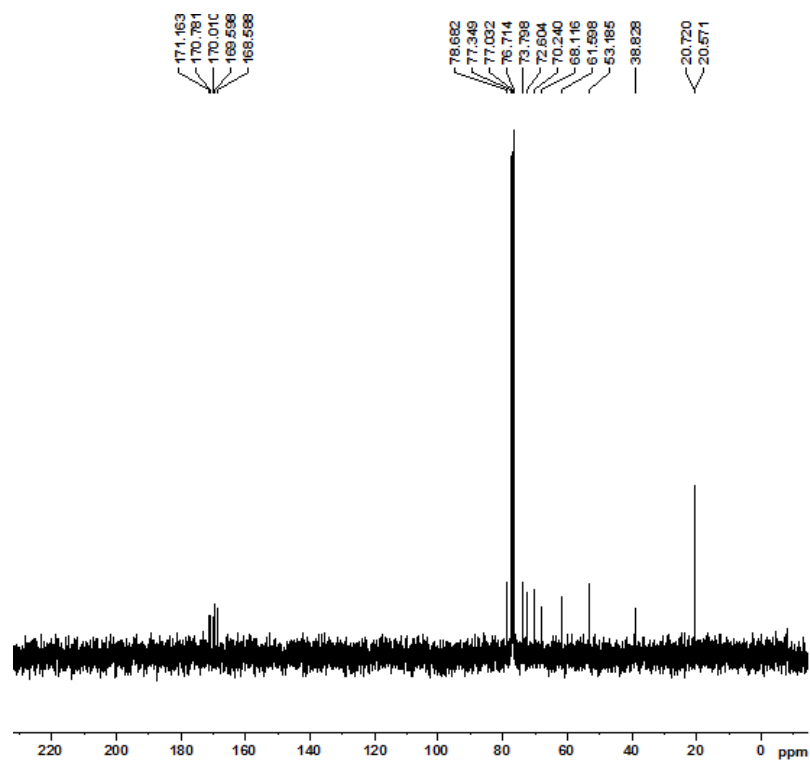

Figure S3  $^{13}\text{C}$  NMR (100 MHz,  $\text{CDCl}_3$ ) spectrum of **3**

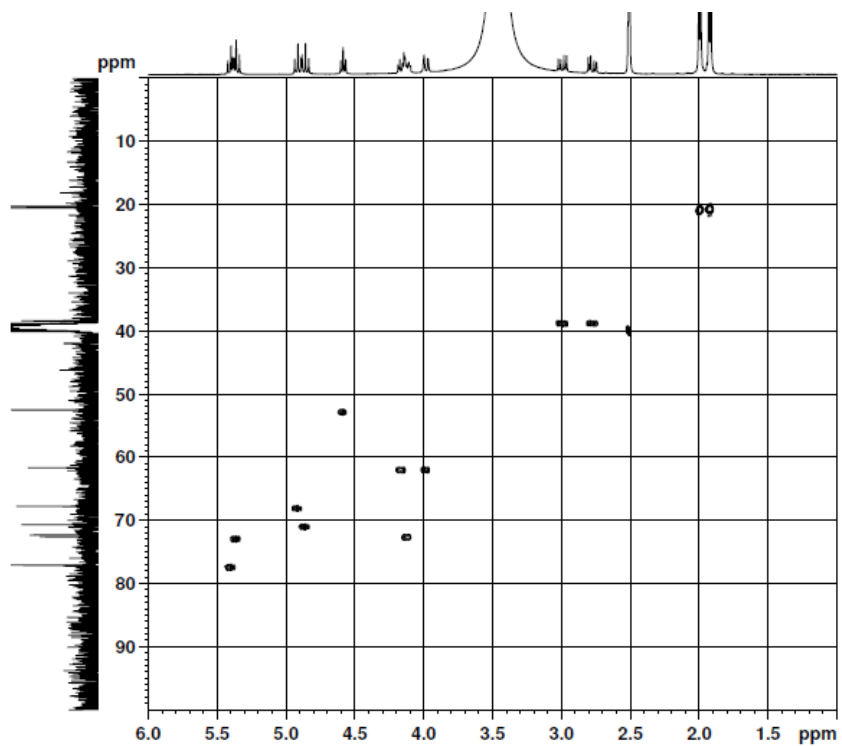

Figure S4 HSQC (DMSO- $d_6$ ) spectrum of **3**

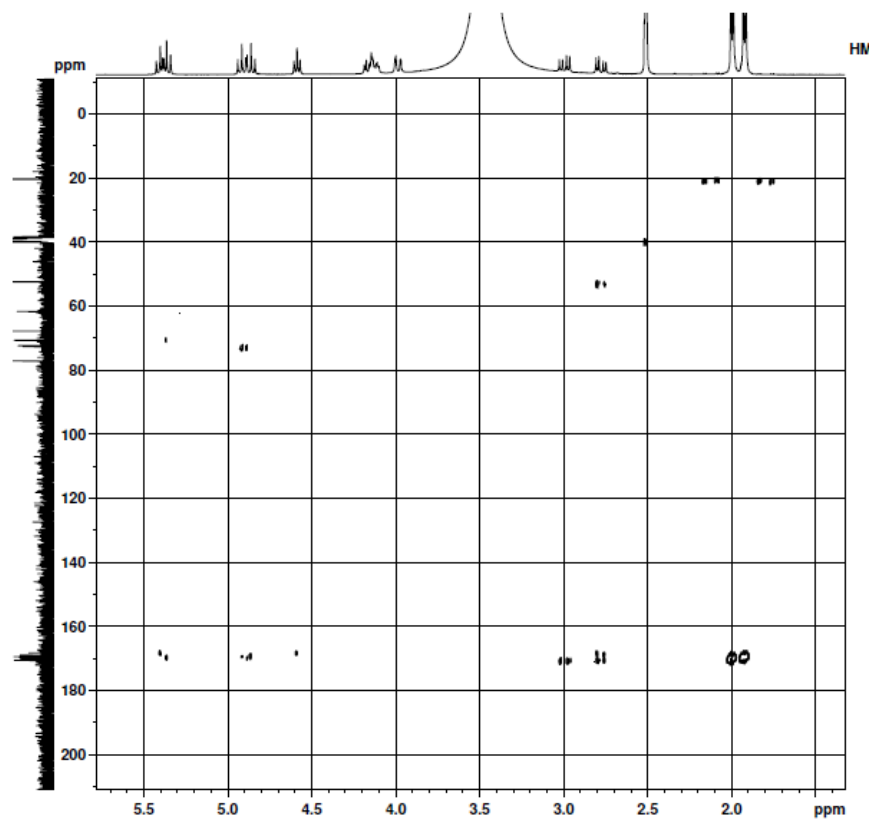

Figure S5 HMBC (DMSO-d<sub>6</sub>) spectrum of **3**

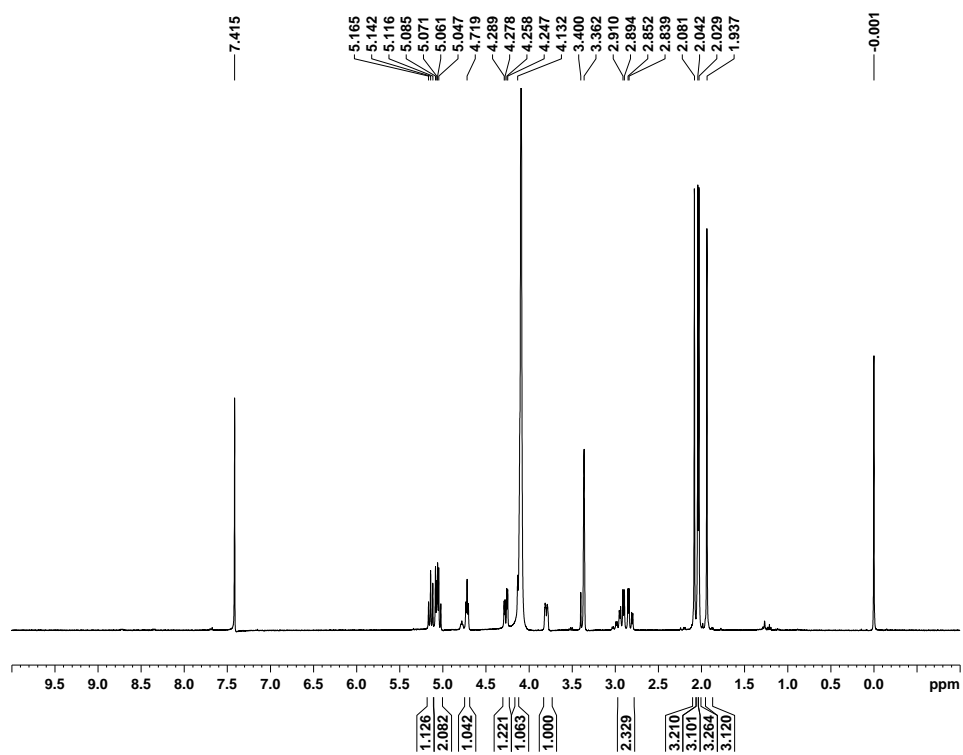

Figure S6 <sup>1</sup>H NMR (400 MHz, MeOD + CDCl<sub>3</sub>) spectrum of **7**

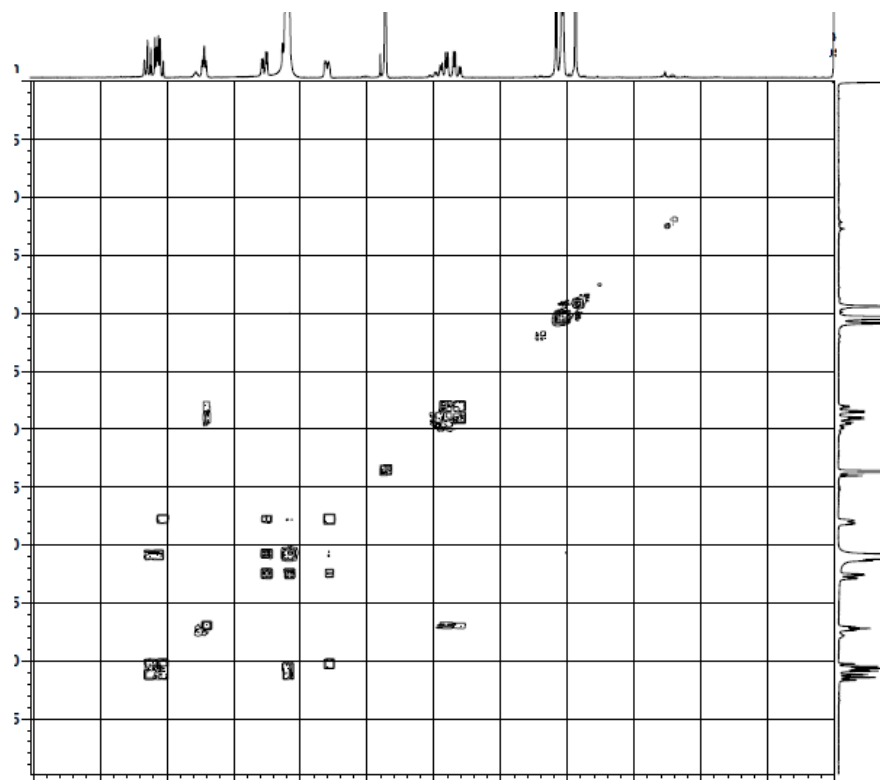

Figure S7  $^1\text{H}$ - $^1\text{H}$  COSY NMR spectrum of **7**

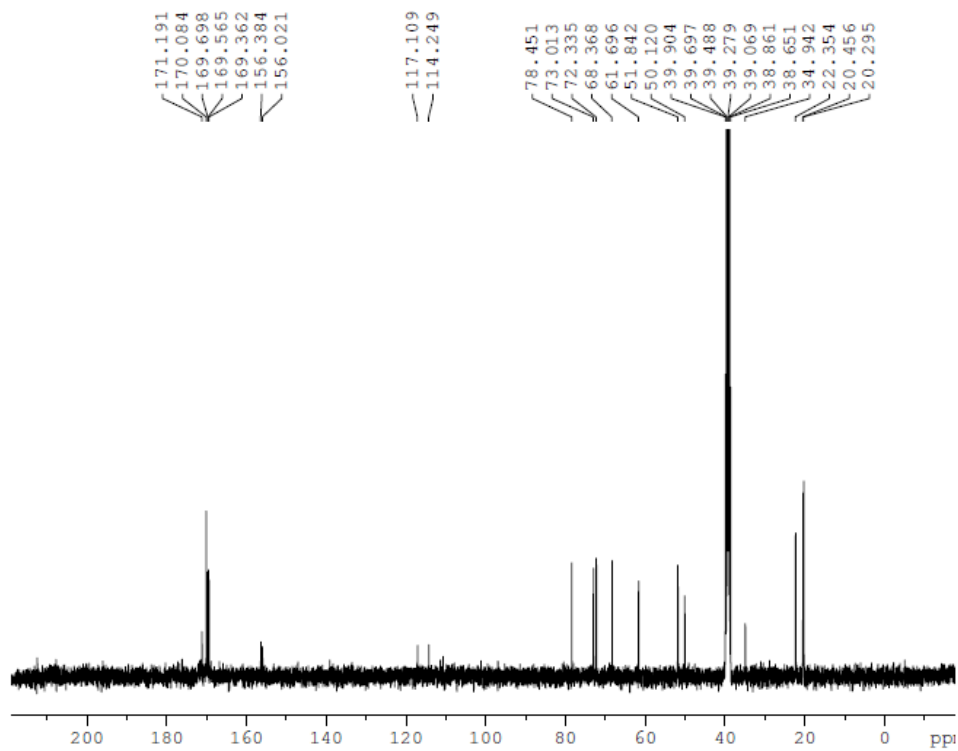

Figure S8  $^{13}\text{C}$  NMR (100 MHz, DMSO- $d_6$ ) spectrum of **7**

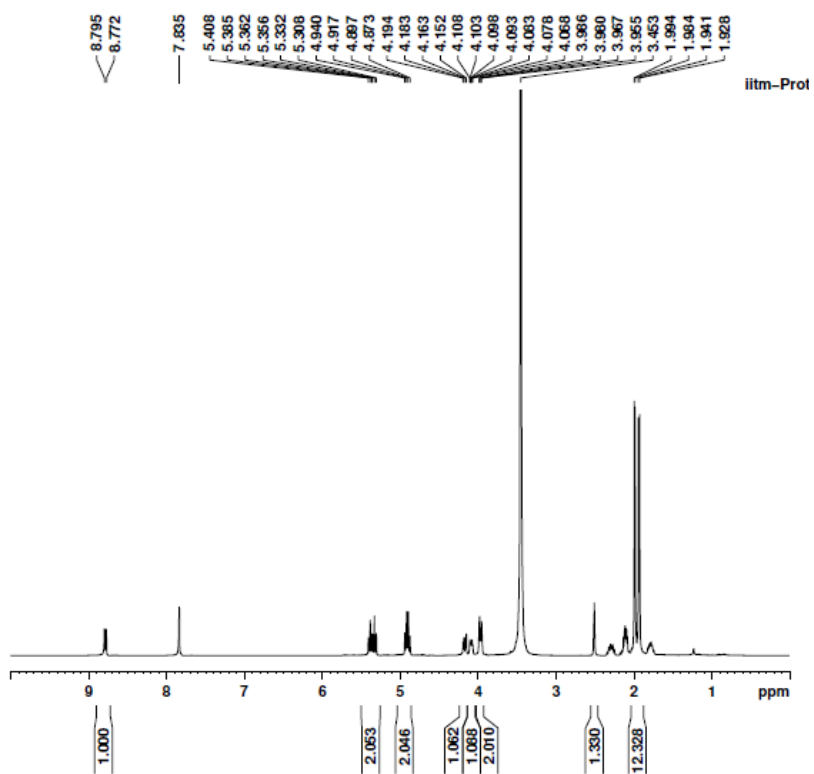

**Figure S9**  $^1\text{H}$  NMR (400 MHz, DMSO- $d_6$ ) spectrum of **10**

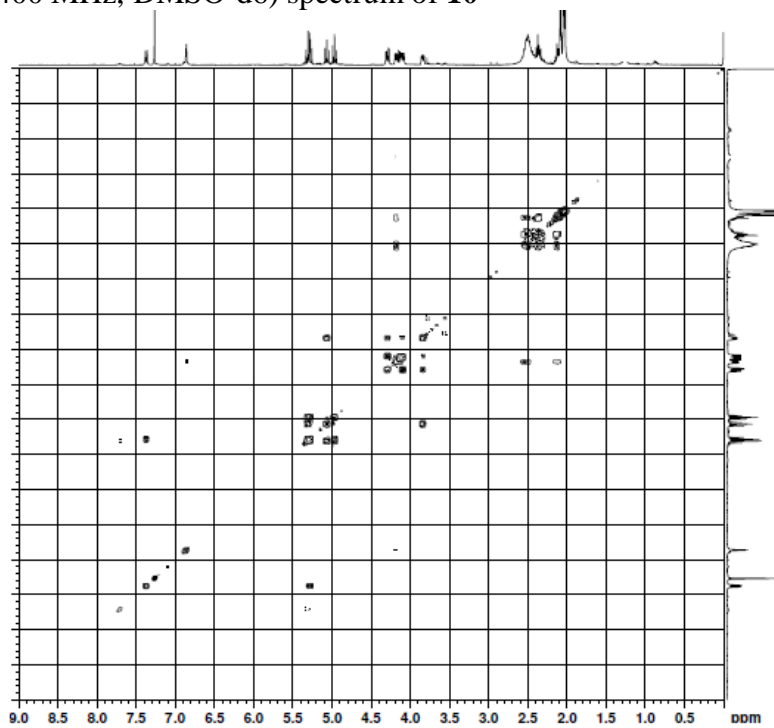

**Figure S10**  $^1\text{H}$ - $^1\text{H}$  COSY NMR spectrum of **10**

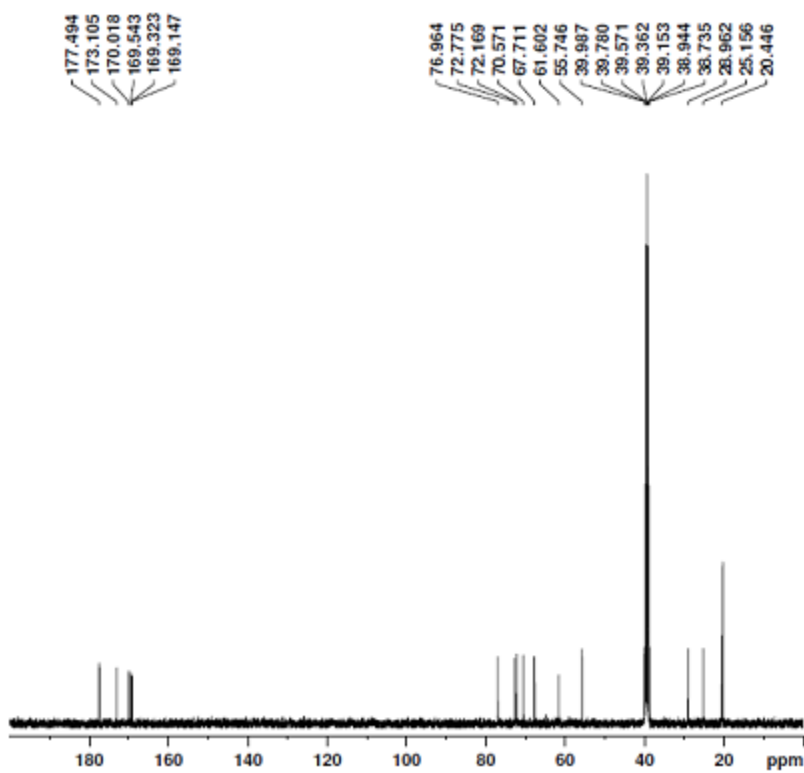

Figure S11  $^{13}\text{C}$  NMR (100 MHz, DMSO-d<sub>6</sub>) spectrum of **10**

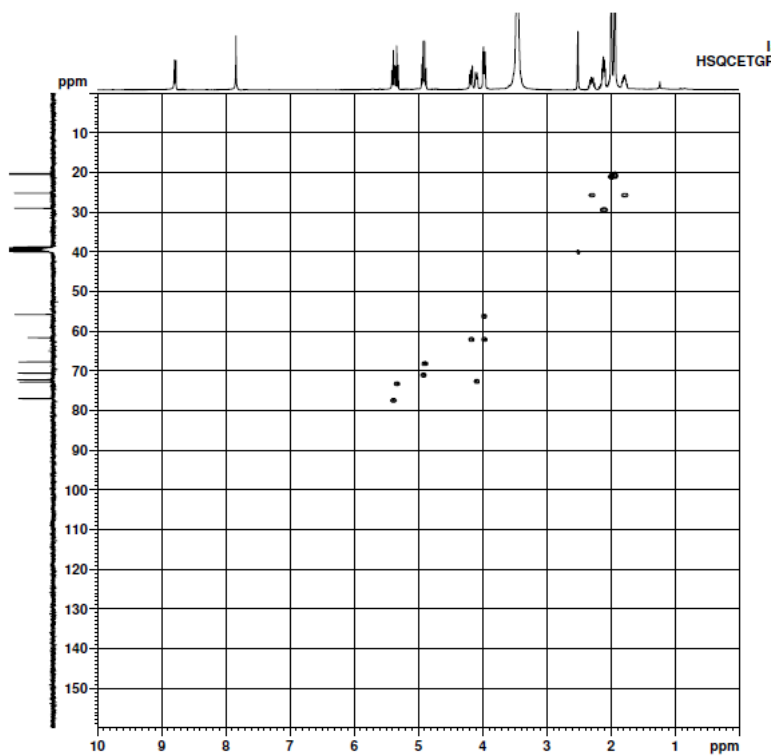

Figure S12 HSQC (DMSO-d<sub>6</sub>) spectrum of **10**



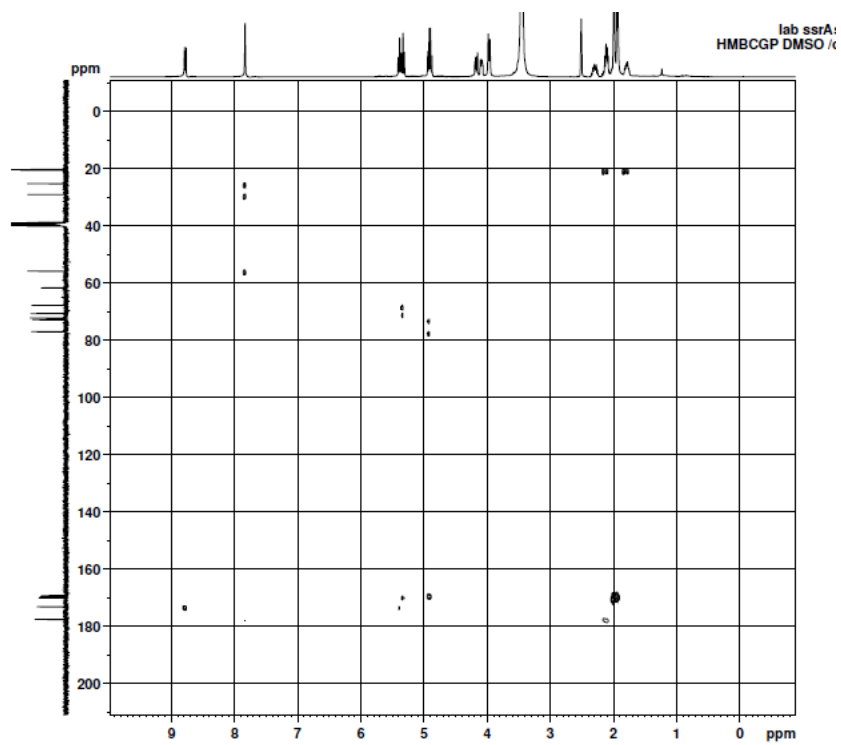

Figure S13 HMBC (DMSO-d<sub>6</sub>) spectrum of **10**

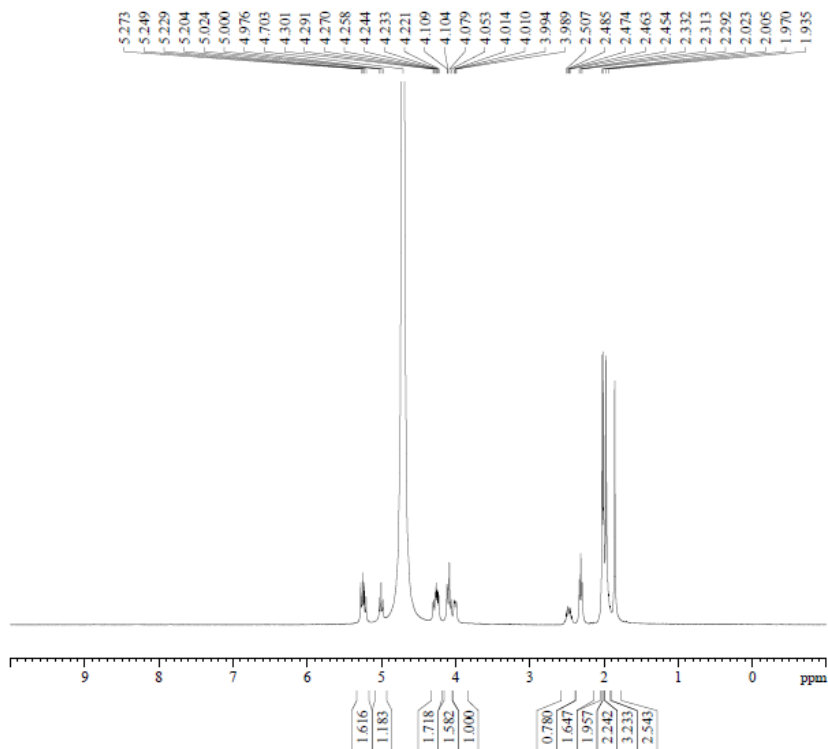

Figure S14 <sup>1</sup>H NMR (400 MHz, D<sub>2</sub>O) spectrum of **11**

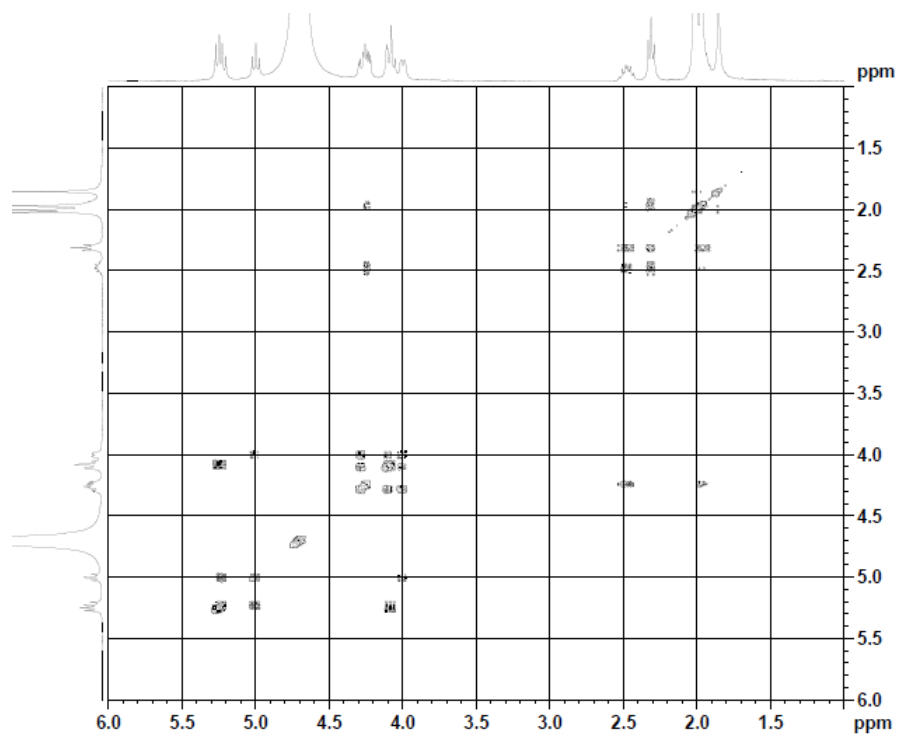

Figure S15  $^1\text{H}$ - $^1\text{H}$  COSY NMR spectrum of **11**

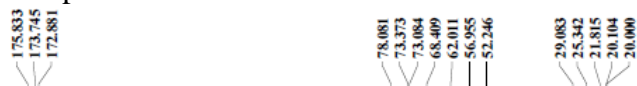

Figure S16  $^{13}\text{C}$  NMR (100 MHz,  $\text{D}_2\text{O}$ ) spectrum of **11**

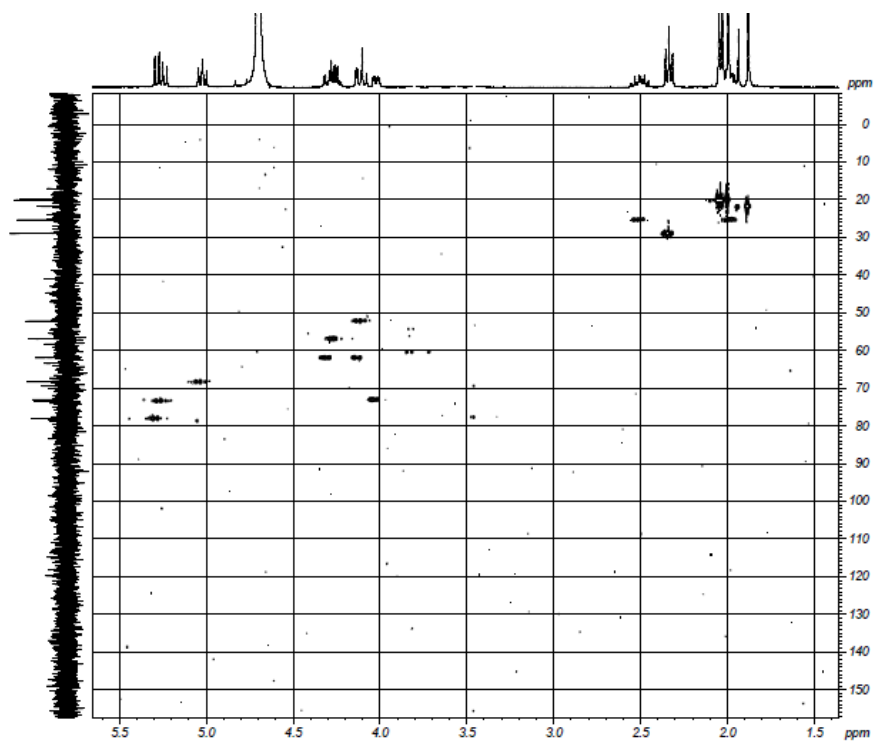

**Figure S17** HSQC (D<sub>2</sub>O) spectrum of **11**

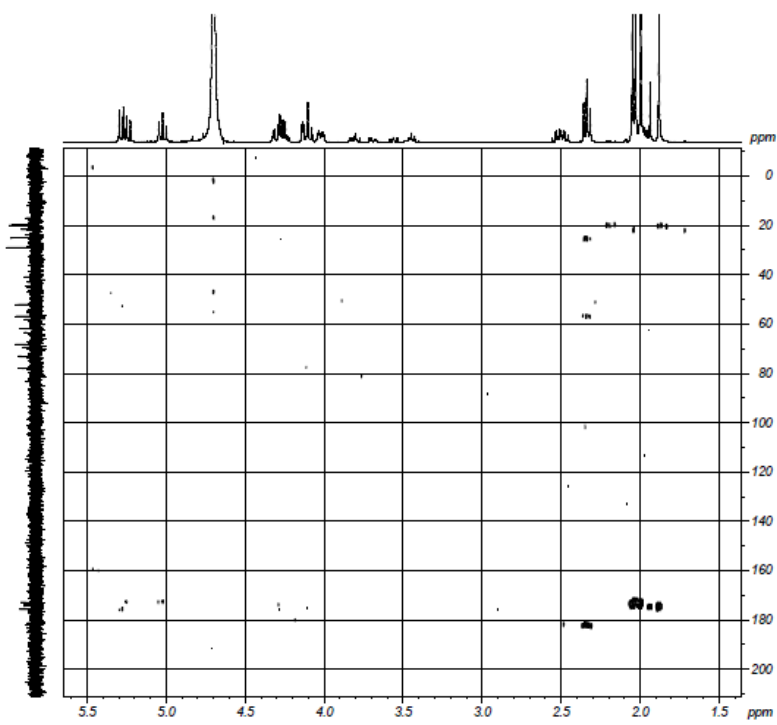

**Figure S18** HMBC (D<sub>2</sub>O) spectrum of **11**

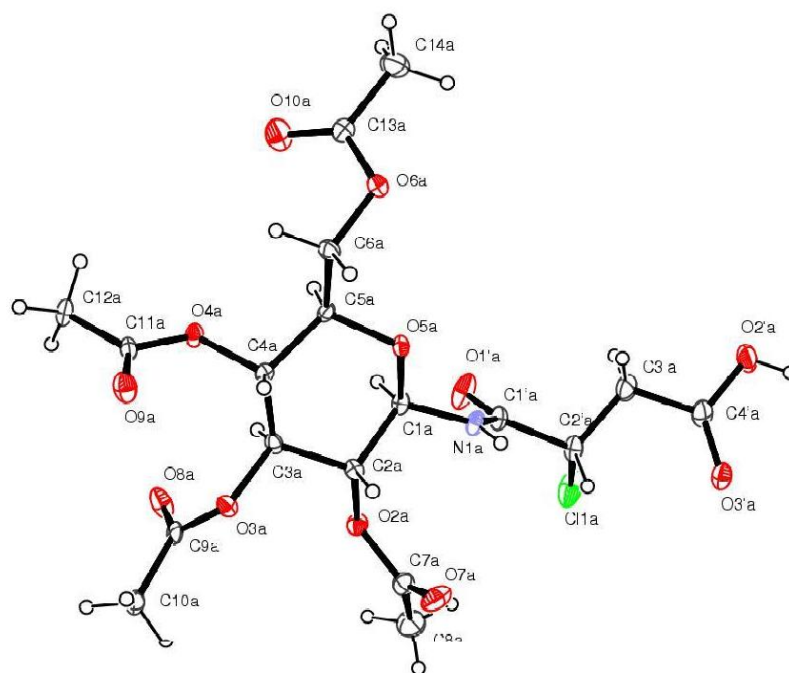

**Figure S9** ORTEP diagram of the compound **3**

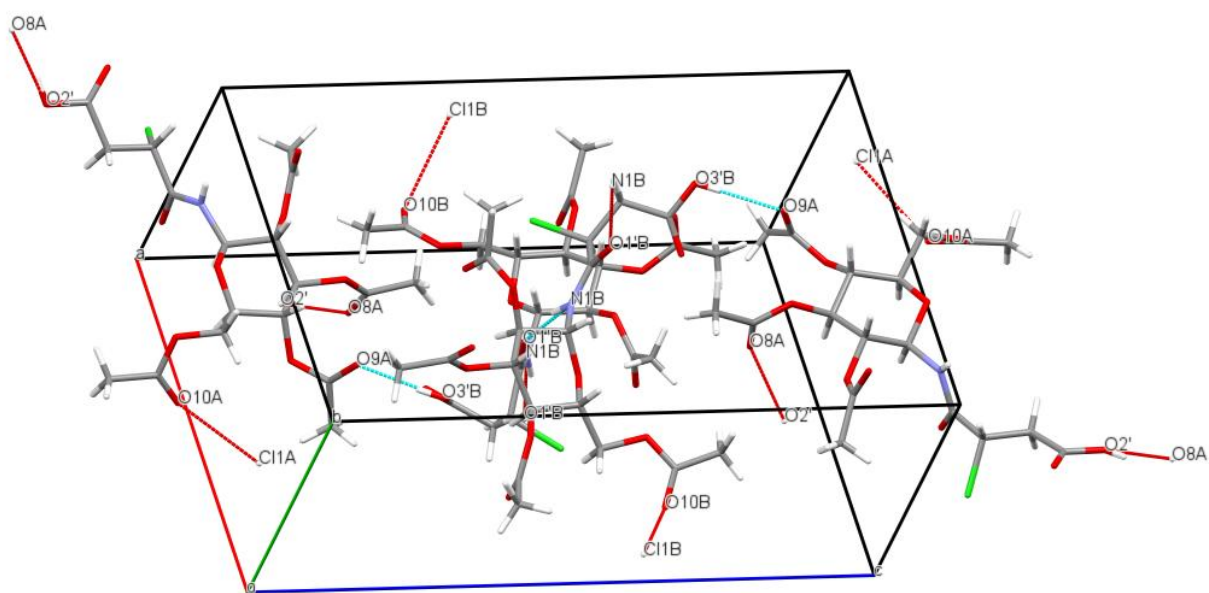

**Figure S10** Unit cell packing diagram of compound **3** with H-bonding

**Table S1** Data collection and refinement parameters for the compound **3**

| <b>Parameters</b>                 |                                                                                                                       |
|-----------------------------------|-----------------------------------------------------------------------------------------------------------------------|
| Empirical formula                 | C <sub>18</sub> H <sub>24</sub> ClNO <sub>12</sub>                                                                    |
| Formula weight                    | 481.83                                                                                                                |
| Temperature                       | 173(2) K                                                                                                              |
| Wavelength                        | 0.71073 Å                                                                                                             |
| Crystal system space group        | Monoclinic, <i>P2<sub>1</sub></i>                                                                                     |
| Unit cell dimensions              | a = 11.9031(9)Å    alpha = 90 deg.<br>b = 9.4411(5)Å    beta = 94.702 (2) deg.<br>c = 19.8615(15)Å    gamma = 90 deg. |
| Volume                            | 2224.5(3) Å <sup>3</sup>                                                                                              |
| Z                                 | 4                                                                                                                     |
| Calculated density                | 1.439 Mg/m <sup>3</sup>                                                                                               |
| Absorption coefficient            | 0.235 mm <sup>-1</sup>                                                                                                |
| F (000)                           | 1008                                                                                                                  |
| Crystal size                      | 0.25 x 0.20 x 0.15 mm                                                                                                 |
| Theta range for data collection   | 1.03 to 26.99 deg.                                                                                                    |
| Limiting indices                  | -14<=h<=12, -9<=k<=11, -24<=l<=23                                                                                     |
| Reflections collected / unique    | 11342 / 6448 [R(int) = 0.0447]                                                                                        |
| Completeness to theta = 25.00     | 91.3%                                                                                                                 |
| Absorption correction             | None                                                                                                                  |
| Max. and min. transmission        | 0.9655 and 0.9435                                                                                                     |
| Refinement method                 | Full-matrix least-squares on F <sup>2</sup>                                                                           |
| Data / restraints / parameters    | 6448 / 1 / 596                                                                                                        |
| Goodness-of-fit on F <sup>2</sup> | 0.877                                                                                                                 |
| Final R indices [I>2sigma(I)]     | R1 = 0.0539, wR2 = 0.1283                                                                                             |
| R indices (all data)              | R1 = 0.0846, wR2 = 0.1495                                                                                             |
| Absolute structure parameter      | 0.04(10)                                                                                                              |
| Largest difference peak and hole  | 0.564 and -0.364 e. Å <sup>-3</sup>                                                                                   |
